# Supplementary material for: Water adsorption at the (010) and (101) surfaces of CuWO4
Source: Royal Society of Chemistry journal article supplement (doi:10.1039/d4cp02699c), 2024-01-01
Supplement: d4cp02699c1.pdf [file d4cp02699c1.pdf]

Supporting information for:

## Water adsorption at the (010) and (101) surfaces of $\text{CuWO}_4$

Xuan Chu,<sup>1</sup> David Santos-Carballal,<sup>1,\*</sup> Nora H de Leeuw<sup>1,2</sup>

<sup>1</sup>School of Chemistry, University of Leeds, Leeds LS2 9JT, United Kingdom

<sup>2</sup>Department of Earth Sciences, Utrecht University, Princetonplein 8A, 3584 CD Utrecht, The Netherlands

### Table of Contents

- Adsorption energy calculated by DFT at 0 K ( $\Delta E_{DFT}$ ), Zero-point energy ( $\Delta E_{zpe}$ ), vibrational contribution to the entropy ( $\Delta S$ ), and Helmholtz free energy ( $\Delta F$ ) of pristine (010) and reduced (101) surface.
- Figure S1. The equilibrium morphologies of  $\text{CuWO}_4$  under 700 K. The pristine (001), oxidized (011), oxidized (100), oxidized (110), and oxidized (111) surfaces are coloured in red, yellow, green, cyan, and purple, respectively. The surface coverage of each surface is noted in the figure.

- Table S1. Adsorption energy calculated by DFT at 0 K ( $\Delta E_{DFT}$ ), Zero-point energy ( $\Delta E_{zpe}$ ), vibrational contribution to the entropy ( $\Delta S$ ), and Helmholtz free energy ( $\Delta F$ ) of pristine (010) and reduced (101) surface.

| Configuration          | $\Delta E_{DFT}$ (eV) | $\Delta E_{zpe}$ (eV) | $\Delta S$ (J/(mol·K)) | $\Delta F$ (eV) |
|------------------------|-----------------------|-----------------------|------------------------|-----------------|
| Pristine (010) surface |                       |                       |                        |                 |
| $\mu_{3-\eta}^3$       | -0.89                 | 0.09                  | 0.00012                | -0.84           |
| $\mu_{2-\eta}^2$       | -0.69                 | 0.09                  | 0.00012                | -0.64           |
| $\mu_{1-\eta}^1$       | -0.69                 | 0.09                  | 0.00012                | -0.64           |
| $\mu_{2-\eta}^2$       | -0.26                 | 0.09                  | 0.00011                | -0.21           |
| $\mu_{2-\eta}^2$       | -0.12                 | 0.08                  | 0.00015                | -0.09           |
| Reduced (101) surface  |                       |                       |                        |                 |
| $\mu_{2-\eta}^2$       | -0.81                 | 0.09                  | 0.00012                | -0.76           |
| $\mu_{2-\eta}^2$       | -0.63                 | 0.09                  | 0.00012                | -0.58           |
| $\mu_{3-\eta}^3$       | -0.53                 | 0.08                  | 0.00012                | -0.48           |
| $\mu_{3-\eta}^3$       | -0.53                 | 0.08                  | 0.00016                | -0.50           |

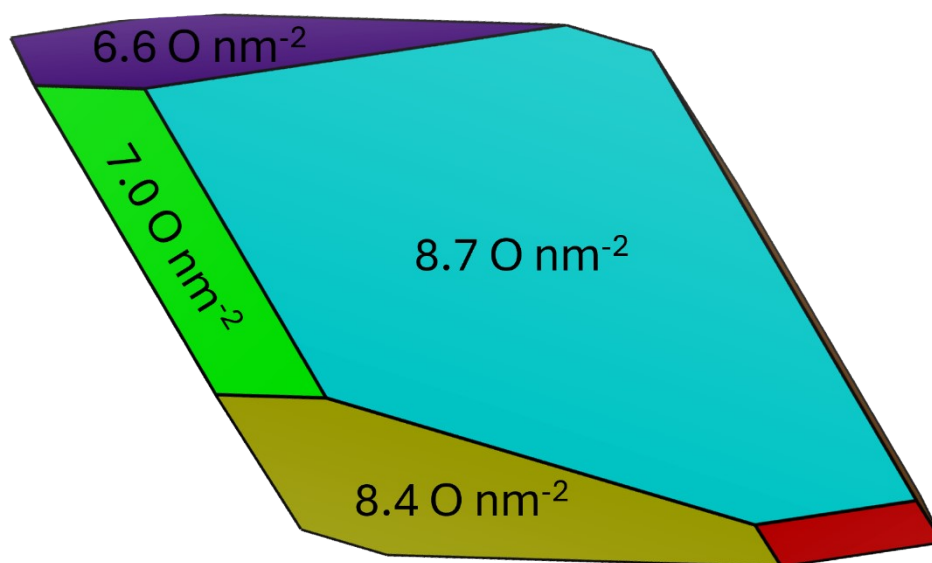

Figure S1. The equilibrium morphologies of  $\text{CuWO}_4$  under 700 K. The pristine (001), oxidized (011), oxidized (100), oxidized (110), and oxidized (111) surfaces are coloured in red, yellow, green, cyan, and purple, respectively. The surface coverage of each surface is noted in the figure.
